# Supplementary material
Source: Springer Nature journal article supplement (https://www.springermedizin.de/resource/supplementary/40169_2014_54_MOESM4_ESM.pdf/9675476)

**A** Adipocytes (Mesoderm)

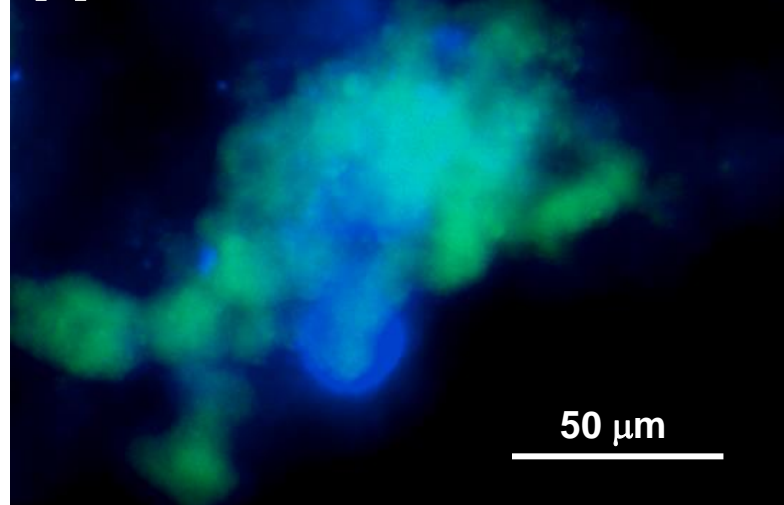

**B** Smooth muscle (Mesoderm)

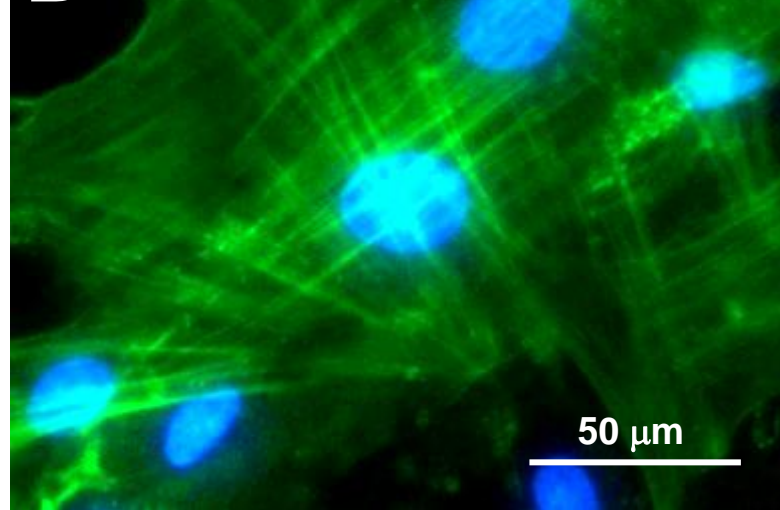

**C** Hepatocytes (Endoderm)

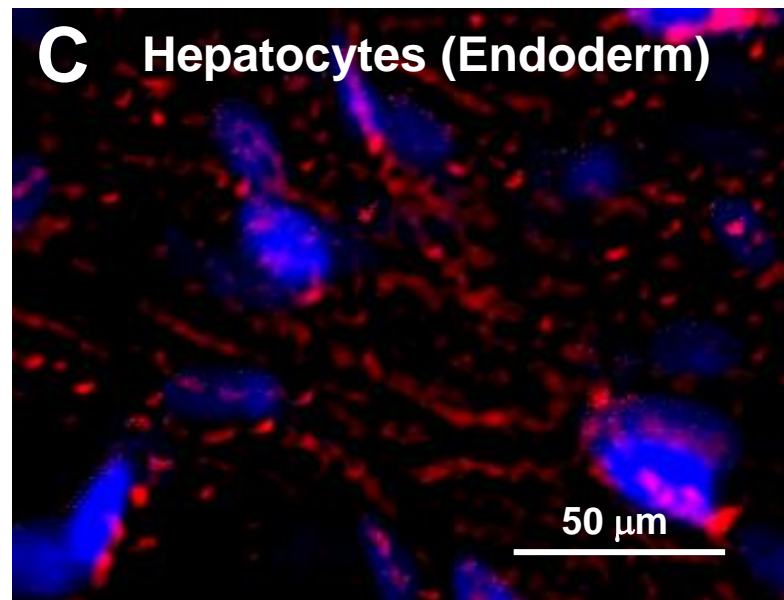

**D** Neurons (Ectoderm)

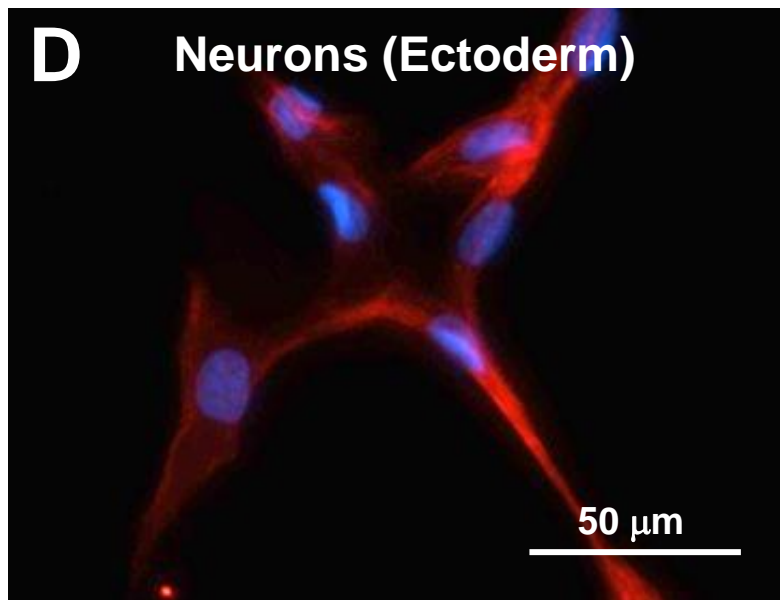

Supplement: MOESM4 [file 9675476]
